# Supplementary material for: Family Cluster Analysis of Severe Fever with Thrombocytopenia Syndrome Virus Infection in Korea
Source: PubMed Central journal article supplement (PMC5154449; doi:10.4269/ajtmh.16-0527), 2016-12-07
Supplement: SD3.pdf [file SD3.pdf]

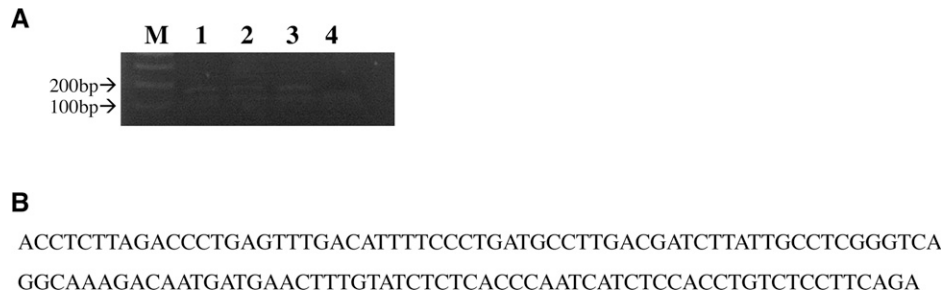

SUPPLEMENTAL FIGURE 1. (A) Amplification of the partial S sequences of severe fever with thrombocytopenia syndrome virus from family 1 (D) by real-time reverse transcription polymerase chain reaction<sup>10</sup> and (B) partial S sequences. Lane M = marker DNA (25- and 100-base-pair mixed DNA ladder); 1 = family 1; 2 = family 1; 3 = family 1; 4 = negative control.

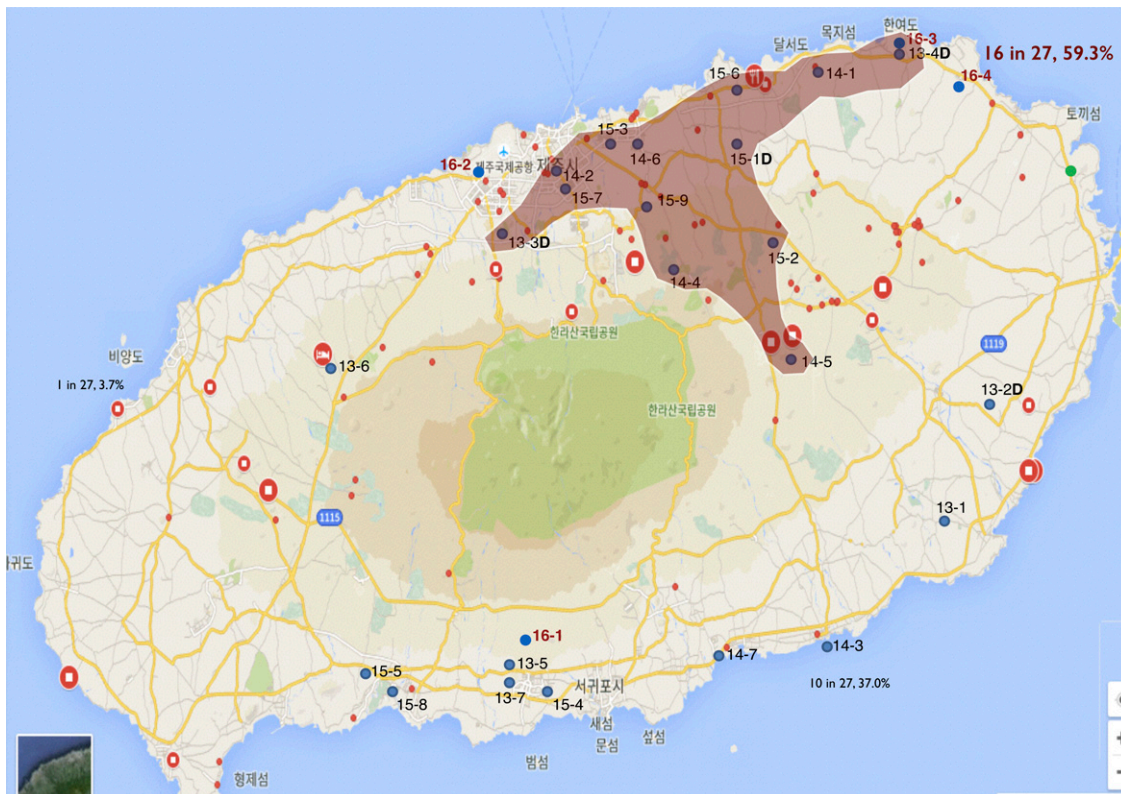

SUPPLEMENTAL FIGURE 2. Geographical distribution of severe fever with thrombocytopenia syndrome cases in Jeju, Korea, from May 2013 to August 2016 ( $n = 27$ ).
